# Supplementary material for: Plakofuranolactone as a Quorum Quenching Agent from the Indonesian Sponge Plakortis cf. lita
Source: PubMed Central journal article supplement (PMC5367016; doi:10.3390/md15030059), 2017-02-28
Supplement: marinedrugs-15-00059-s001.pdf [file marinedrugs-15-00059-s001.pdf]

# Supplementary Materials: Plakofuranolactone as a Quorum Quenching Agent from the Indonesian Sponge *Plakortis cf. lita*

Valeria Costantino, Gerardo Della Sala, Kumar Saurav, Roberta Teta, Rinat Bar-Shalom, Alfonso Mangoniand Laura Steindler

**Table S1.** Calculated relative energies ( $\Delta E$ ), relative free energies ( $\Delta G$ ), and optical rotations of the conformers of **1** at the CAM-B3LYP/AUG-cc-pVDZ level.

| Conformer          | $\Delta E$ (kcal/mol) | $\Delta G$ (kcal/mol) | Boltzmann factor <sup>a</sup> | $[\alpha]$ |
|--------------------|-----------------------|-----------------------|-------------------------------|------------|
| 1                  | 0.00                  | 0.00                  | 1.00                          | -120.1     |
| 2                  | 0.35                  | 0.37                  | 0.54                          | -130.5     |
| 3                  | 0.45                  | 0.49                  | 0.43                          | +5.4       |
| 4                  | 0.61                  | 0.48                  | 0.45                          | -82.9      |
| 5                  | 0.73                  | 0.83                  | 0.25                          | -84.4      |
| 6                  | 1.02                  | 1.19                  | 0.13                          | +52.5      |
| 7                  | 1.22                  | 1.15                  | 0.14                          | -55.9      |
| 8                  | 1.65                  | 2.06                  | 0.03                          | -11.6      |
| 9                  | 1.89                  | 2.27                  | 0.02                          | -66.8      |
| 10                 | 3.03                  | 3.58                  | 0.00                          | +65.8      |
| 11                 | 3.72                  | 4.08                  | 0.00                          | +59.6      |
| 12                 | 3.91                  | 4.49                  | 0.00                          | -32.7      |
| weighted mean      |                       |                       |                               | -82.8      |
| experimental value |                       |                       |                               | -84.0      |

<sup>a</sup> At T = 298 K, calculated on  $\Delta G$ .

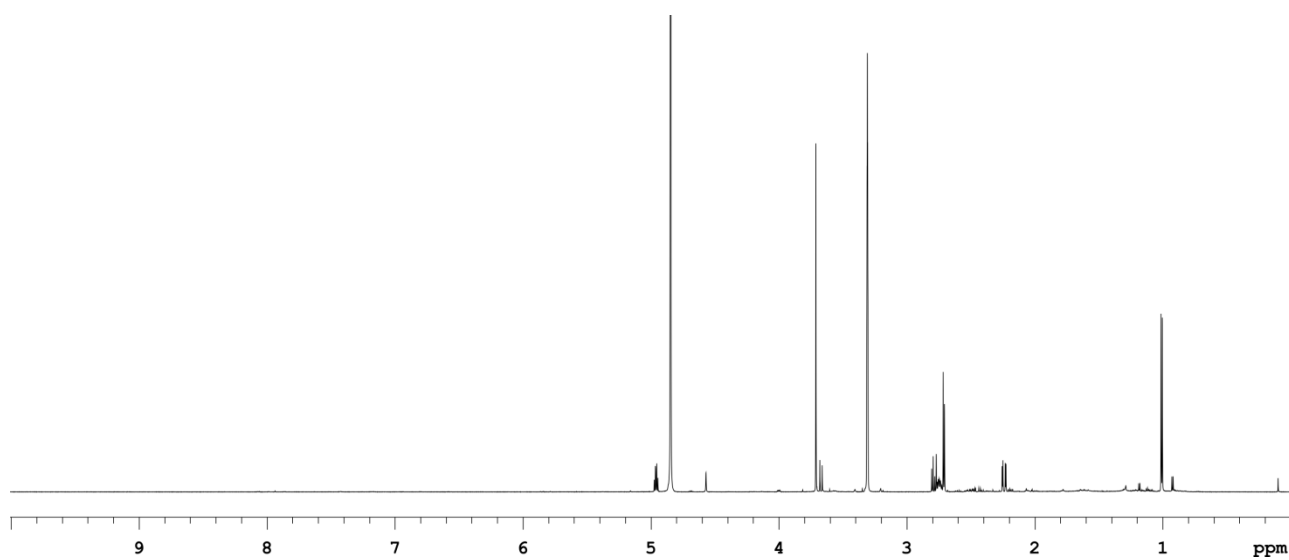

**Figure S1.**  $^1\text{H}$ -NMR spectrum of plakofuranolactone (**1**) (700 MHz,  $\text{CD}_3\text{OD}$ ).

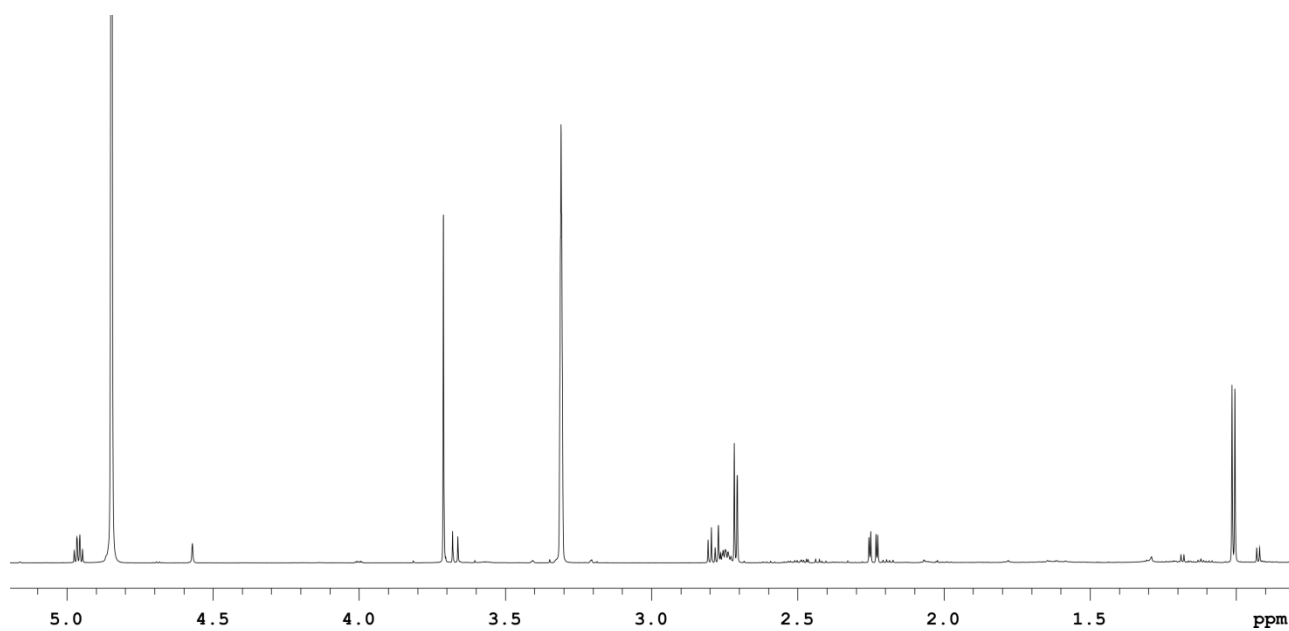

**Figure S2.** Expansion of the  $^1\text{H}$ -NMR spectrum of plakofuranolactone (**1**) (700 MHz,  $\text{CD}_3\text{OD}$ ).

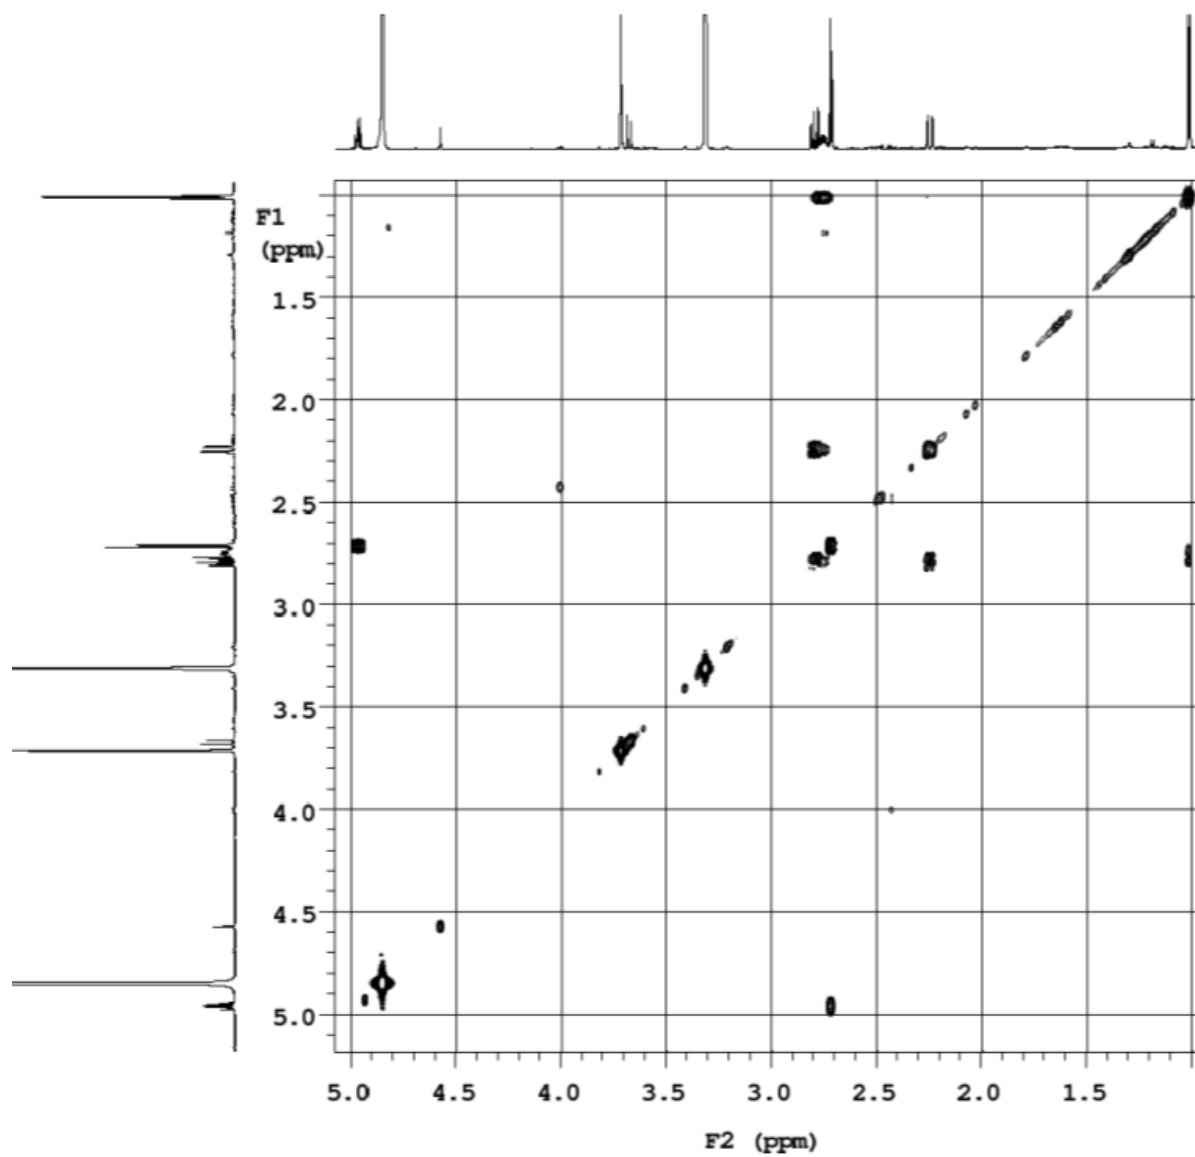

Figure S3. COSY spectrum of plakofuranolactone (1) (700 MHz, CD<sub>3</sub>OD).

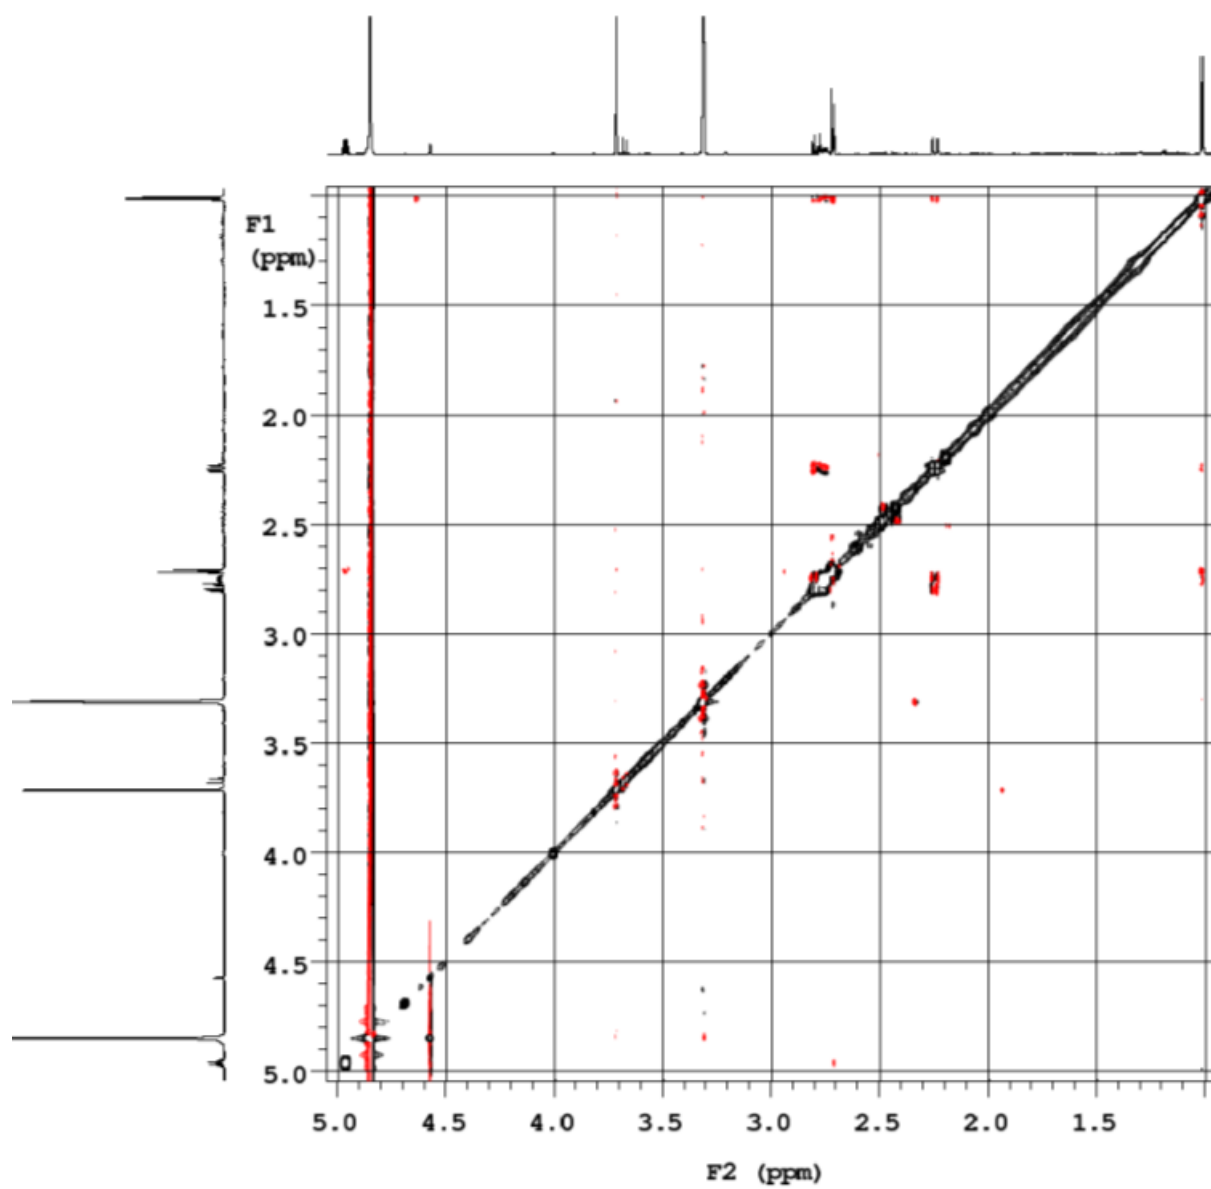

Figure S4. NOESY spectrum of plakofuranolactone (1) (700 MHz, CD<sub>3</sub>OD).

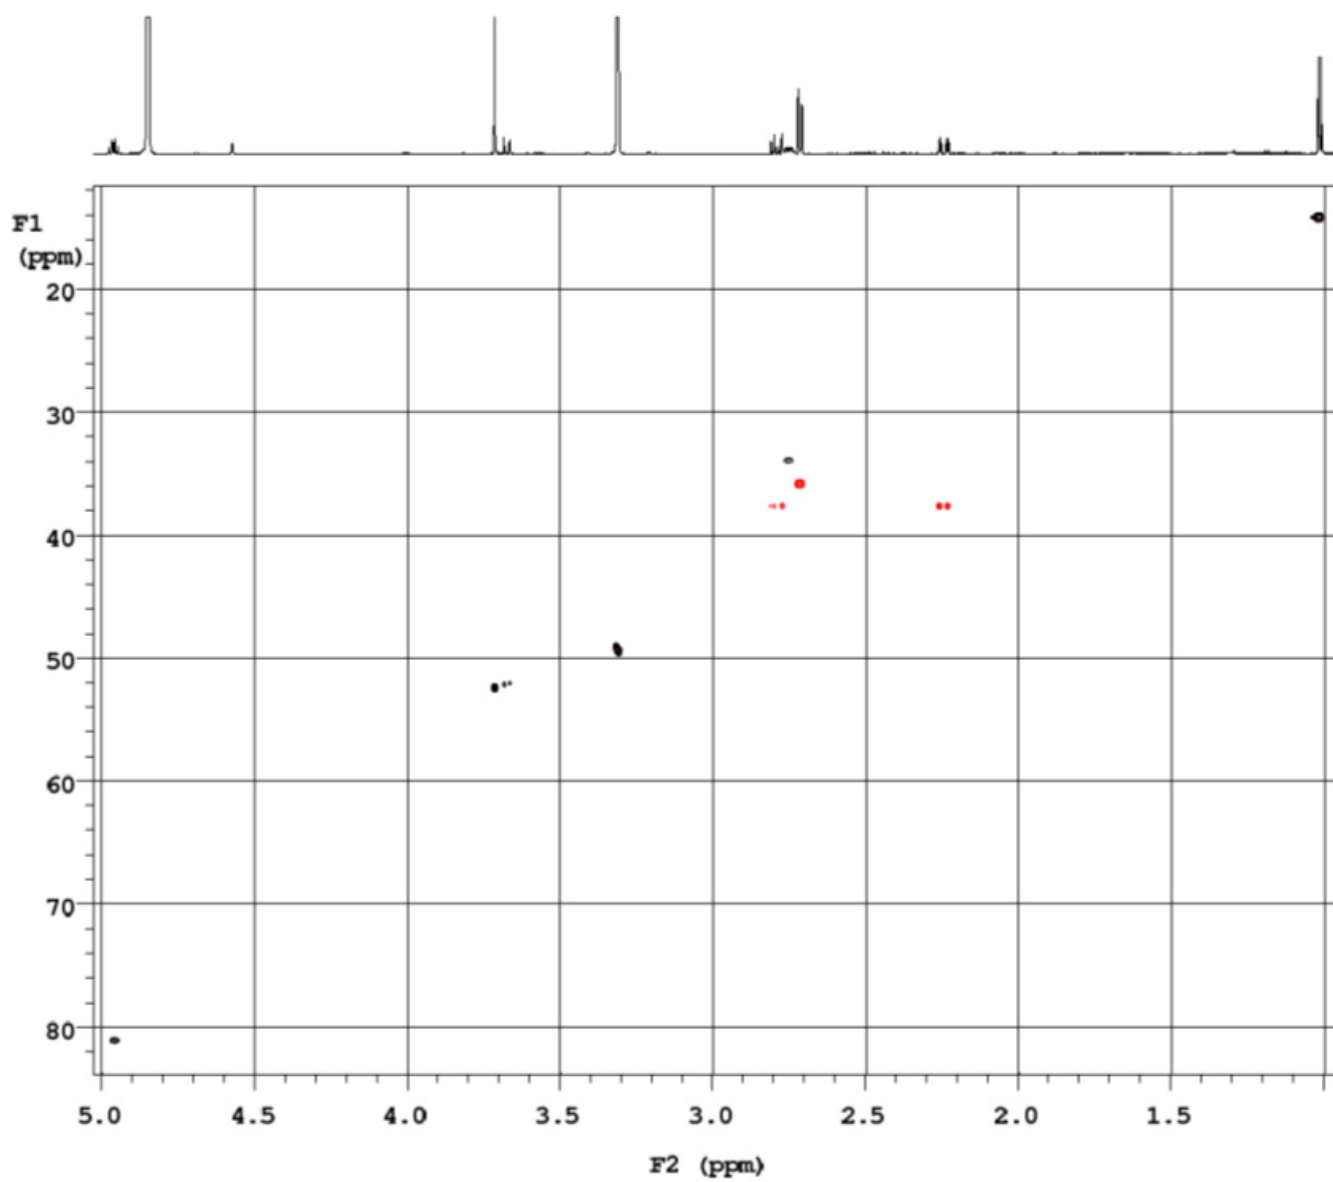

Figure S5. HSQC spectrum of plakofuranolactone (1) (700 MHz, CD<sub>3</sub>OD).

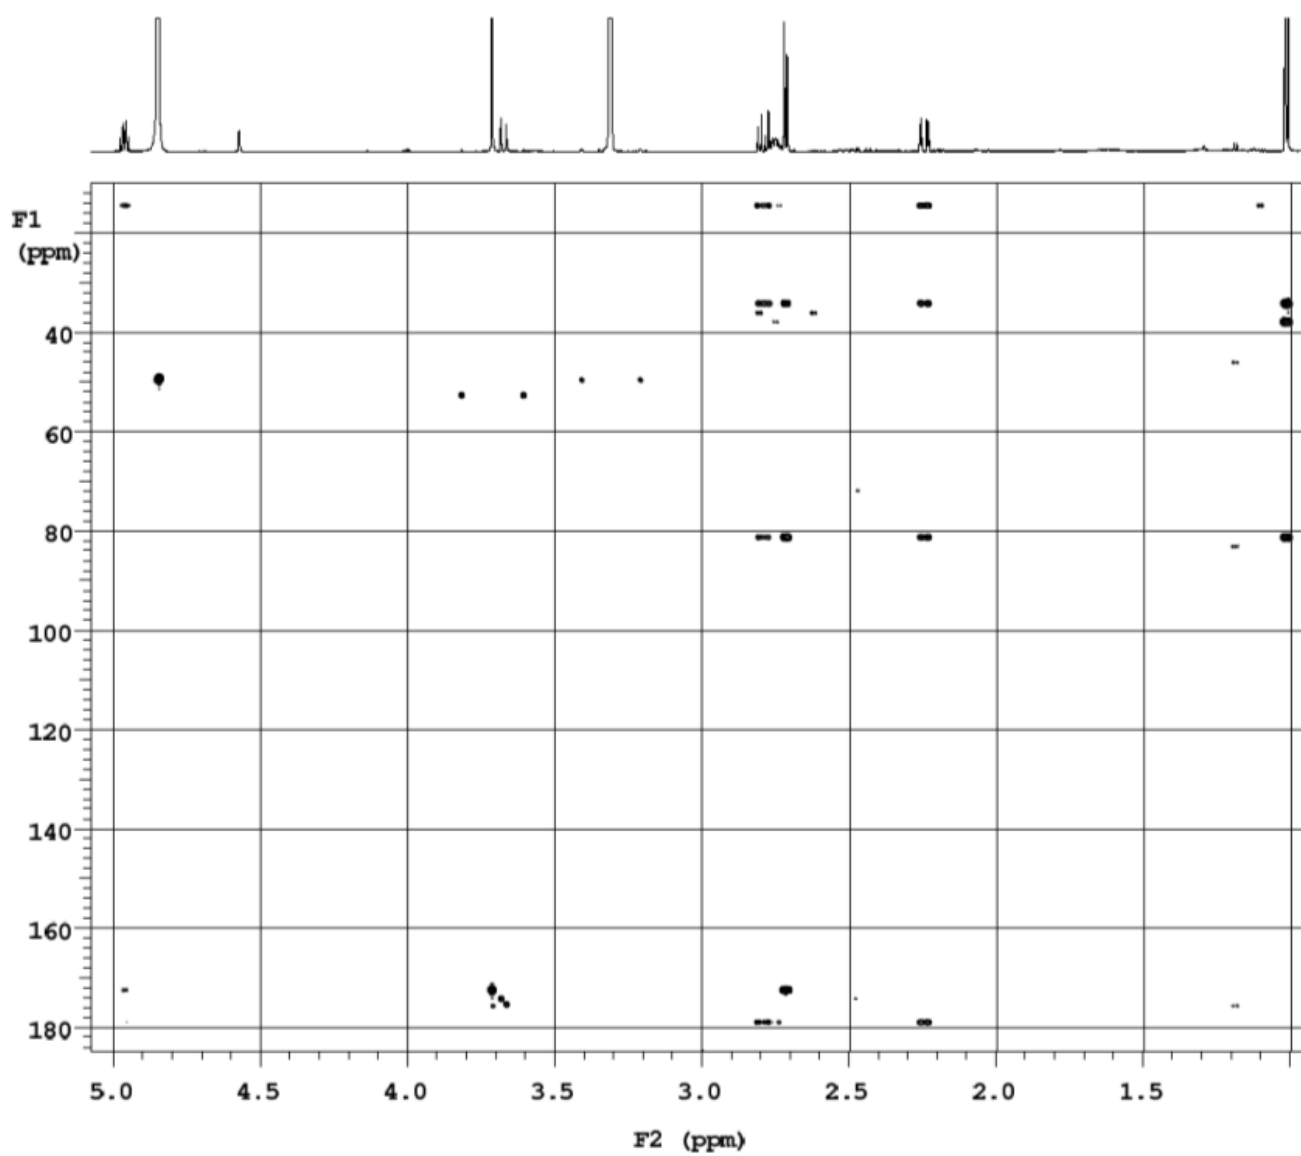

Figure S6. HMBC spectrum of plakofuranolactone (1) (700 MHz, CD<sub>3</sub>OD).

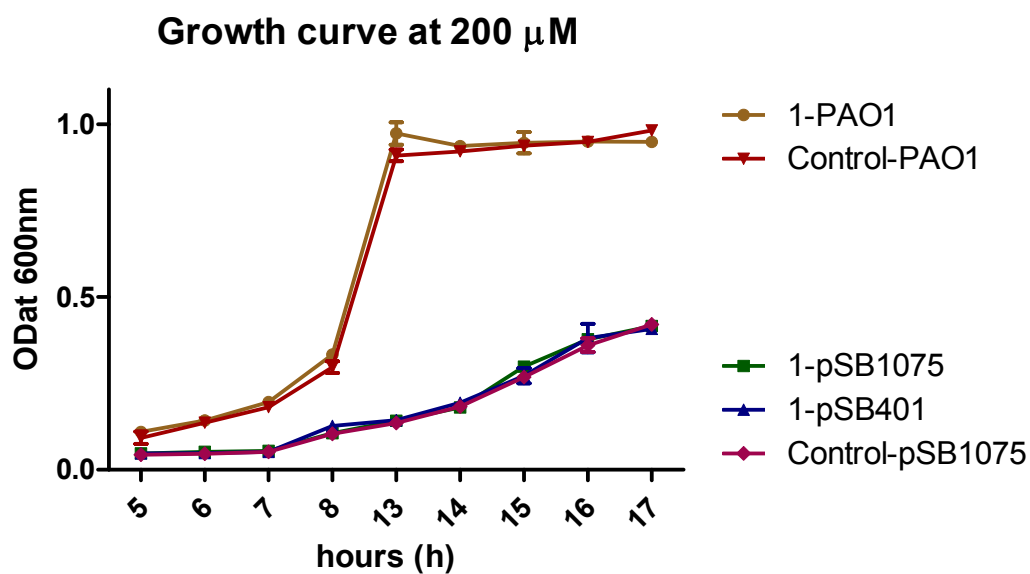

**Figure S7.** Growth curve inhibition profile of plakofuranolactone (**1**) at 200  $\mu$ M against *Pseudomonas aeruginosa* PAO1, *E.coli* pSB401 and *E.coli* pSB1075. The control represents the growth of the tested organism grown in the presence of the solvent used for dilutions (methanol).

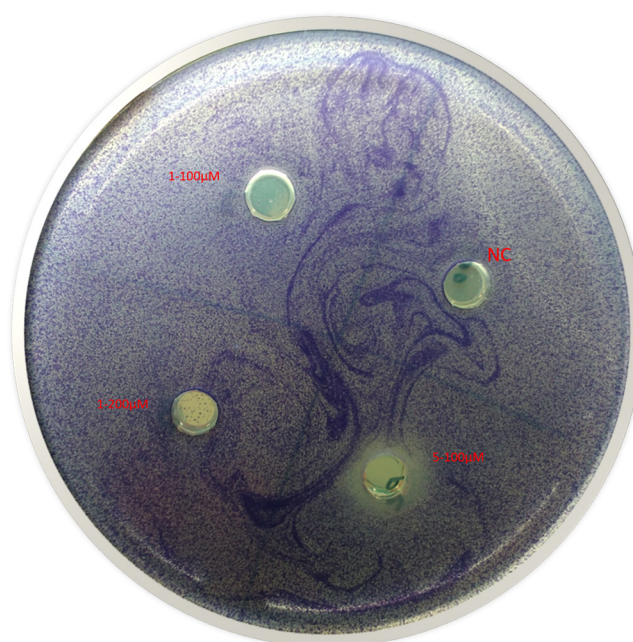

**Figure S8.** Overlaid well diffusion assay of plakofuranolactone (**1**) and penicillic acid (PA, **5**) on the QS dependent CviI/CviR-based reporter *Chromobacterium violaceum* strain CV026 induced by 3-oxo-C6-HSL (final concentration of 1  $\mu$ M). The solvent used for dilution was used as a negative control (NC). A white halo around the well, representing the inhibition of violacein production, interpreted as QQ activity, can only be observed in the treatment PA, **5**.
